# Supplementary material for: Training Load Responses Modelling in Elite Sports: How to Deal with Generalisation?
Source: Research Square preprint supplement (doi:10.21203/rs.3.rs-128940/v1), 2020-12-23
Supplement: Supplementary file 1 [file 5954331b04891d72592abd1f.pdf]

# Training load responses modelling in elite sports: how to deal with generalisation?

Frank Imbach<sup>1,2,3,\*</sup>, Stephane Perrey<sup>2</sup>, Romain Chailan<sup>1</sup>, Thibaut Meline<sup>4</sup>, and Robin Candau<sup>3</sup>

<sup>1</sup>Seenovate, Univ. Montpellier, Montpellier, 34000, France

<sup>2</sup>EuroMov Digital Health in Motion, Univ. Montpellier, IMT Mines Ales, Montpellier, 34090, France

<sup>3</sup>DMeM, Univ. Montpellier, INRAe, Montpellier, 34000, France

<sup>4</sup>Laboratoire Européen Performance Santé Altitude, Univ. Perpignan Via Domitia, Font-Romeu, 66120, France

\*frank.imbach@umontpellier.fr

## Appendix

### Specific training

On-ice sessions refer to specific training. Session TLs were calculated from Power Output ( $PO$ ,  $W$ ), volume and ice properties. Individual  $PO$  depends on power required to change kinetic energy ( $P_{kin}$ ), power required to overcome air and ice resistance ( $P_{aero}$  and  $P_{ice}$  respectively). Let us define

$$P_{kin} = \frac{\frac{1}{2}(mv_f^2 - v_i^2)}{t},$$
$$P_{aer} = \frac{1}{2}AC_D \rho v^3 \quad \text{and}$$
$$P_{ice} = C_f m g \bar{v}.$$

In this context,  $m$  denotes the mass of the athlete and that of the equipment,  $v_f$  is the maximal velocity reached during the run,  $v_i$  is the initial velocity being null,  $\bar{v}$  is the mean velocity and  $t$  is the exercise duration. The effective frontal area  $AC_D$  is a standardised fixed value of  $0.25 \text{ m}^2$  according to subjects corpulence and Van Ingen Schenau<sup>56</sup>. Also,  $\rho$  denotes the air density recorded at 1850 meters above sea and is equal to  $1.029 \text{ kg.m}^{-3}$ . The friction coefficient  $C_f$  is standardised as  $C_f = 0.006$ , according to maximal values found by De Koning *et al.*<sup>57</sup> and due to a track with sharper turns. Finally,  $g$  denotes the acceleration due to the gravity, equal to  $9.80665 \text{ m.s}^{-2}$ .

Thus,

$$PO = P_{kin} + P_{aer} + P_{ice}.$$

Relative intensity of the session ( $I_{ice}$ , as a percentage of the maximal  $PO$ ) can now be determined as

$$I_{ice} = \frac{I_{ice}^f N_f + I_{ice}^b (N - N_f)}{N}. \quad (S1)$$

This relative exercise intensity includes both forward and backward positions denoted  $I_{ice}^f$  and  $I_{ice}^b$  respectively, with

$$I_{ice}^f = \frac{PO}{\max PO} + C,$$
$$I_{ice}^b = I_{ice}^f - E I_{ice}^f.$$

Here,  $C$  denotes the ice impact on skating for an ice quality ( $Q_{ice}$ ) arbitrary measured by athletes on a 0-10 Borg scale and averaged. If  $Q_{ice}$  is below 7.5 arbitrary units (a.u), a linear penalisation is attributed such as  $C = -0.008 Q_{ice} + 0.06$ , where  $\alpha$

and  $\beta$  coefficients were estimated from at least two equal performances with different values of  $Q_{ice}$ . In addition,  $E$  denotes the skating economy due to drafting and  $N$  denotes the overall number of laps with also a distinction for the forward position ( $N_f$ ). Finally, ice session training load is

$$TL_{ice} = I_{ice} V K \left( \frac{I_{RPE}}{\max I_{RPE}} \right) \rho, \quad (S2)$$

where  $V$  is the volume parameter defined as the product of the number of laps run and the distance of a lap;  $K$  depends on the subject's gender with  $K = 0.64 e^{1.92I}$  for males and  $K = 0.86 e^{1.67I}$  for females respectively and according to Banister *et al.*<sup>5</sup>;  $I_{RPE}$  is the rate of perceived exertion quoted on a 6-20 Borg scale,  $\max I_{RPE}$  is the maximal value that can be quoted ( $\max I_{RPE} = 20$ );  $\rho$  denotes the density parameter, such as  $\rho = \frac{1}{2} \rho_s$  with  $\rho_s$  the density of the session (%) which represents the effective work done by the athlete.

### Non-specific training

Training loads of resistance training ( $TL_{RT}$ ), aerobic training ( $TL_{aer}$ ), repeated sprint training ( $TL_{RS}$ ) and activation sessions ( $TL_{act}$ , specific warm-up) were also quantified as

$$TL_{RT} = I_{RT} V K \left( \frac{I_{RPE}}{\max I_{RPE}} \right) \rho, \quad (S3)$$

$$TL_{aer} = I_{RPE} T K \rho_s k_{aer}, \quad (S4)$$

$$TL_{RS} = I_{RS} V K \left( \frac{I_{RPE}}{\max I_{RPE}} \right) \rho \quad \text{and} \quad (S5)$$

$$TL_{act} = I_{RPE} T K \rho_s k_{off}. \quad (S6)$$

Here  $I_{RT}$  denotes the intensity in percentage of the maximal repetition,  $V$  is the volume defined by the number of repetitions,  $T$  is the total time of exertion,  $k_{aer}$  and  $k_{off}$  denote a weighting factor for aerobic and activation exercises such as  $k_{aer} = 5$  a.u (empirically defined by the coach) and  $k_{off} = 15$  a.u respectively. Any of the training sessions are weighted by  $I_{RPE}$ . However, a specific intensity was only quantifiable for  $TL_{RT}$  and  $TL_{RS}$  and further considered in the training load calculation. According to the training condition, Equations S2 – S6 respectively define the discrete function  $w(t)$ .
